# Supplementary material for: Amalgamation in landslide maps: effects and automatic detection
Source: Copernicus journal article supplement (doi:10.5194/nhess-15-723-2015), 2015-04-02
Supplement: Supplementary file 1 [file nhess-15-723-2015-supplement-cover-letter.pdf › nhess-15-723-2015-supplement-cover-letter.pdf]

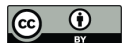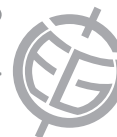

*Supplement of*

## **Amalgamation in landslide maps: effects and automatic detection**

**O. Marc and N. Hovius**

*Correspondence to:* O. Marc ([omarc@gfz-potsdam.de](mailto:omarc@gfz-potsdam.de))

- [nhess-15-723-2015-supplement-cover-letter.pdf](#)
- [AmalgamDetection\\_Release1.m](#)
